# Supplementary material for: Light-triggered hydrophilic drug release from liposomes through removal of a photolabile protecting group
Source: Royal Society of Chemistry journal article supplement (doi:10.1039/c8ra08584f), 2018-12-21
Supplement: c8ra08584f1.pdf [file c8ra08584f1.pdf]

## **Electronic Supplementary Information**

### **Light-triggered hydrophilic drug release from liposomes by removal of photolabile protecting group**

Yuya Goto, Masafumi Ueda, Kouta Sugikawa, Kazuma Yasuhara and  
Atsushi Ikeda

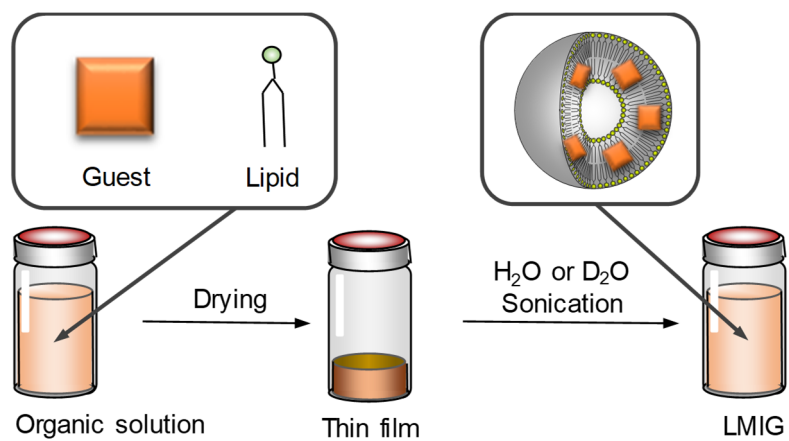

**Scheme S1.** The premixing method for the preparation of LMIGs.

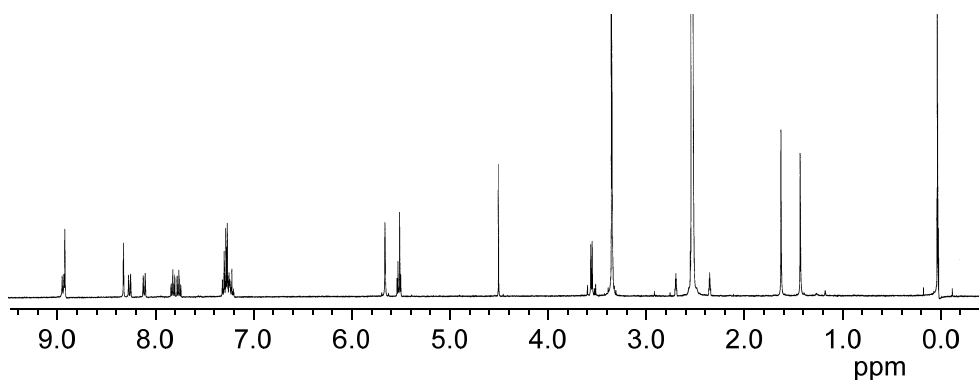

**Fig. S1** Complete  $^1\text{H}$  NMR spectrum of NNM-1 in  $\text{CDCl}_3$ .

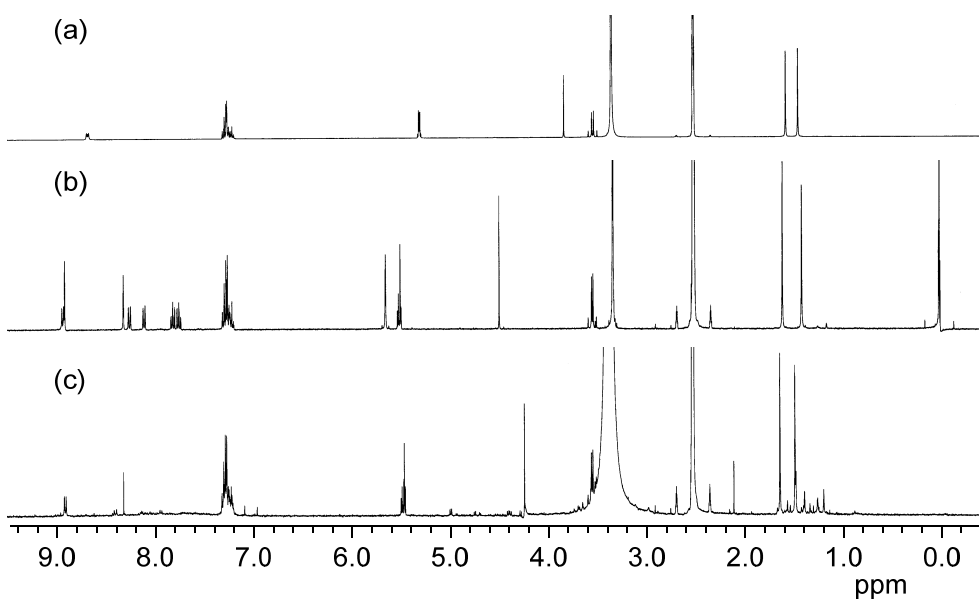

**Fig. S2** Complete  $^1\text{H}$  NMR spectra (400 MHz,  $\text{DMSO}-d_6$ ,  $25\text{ }^\circ\text{C}$ ) of (a) **1** and (b and c) NNM-1 (b) before and (c) after photoirradiation at 354 nm for 24 h.

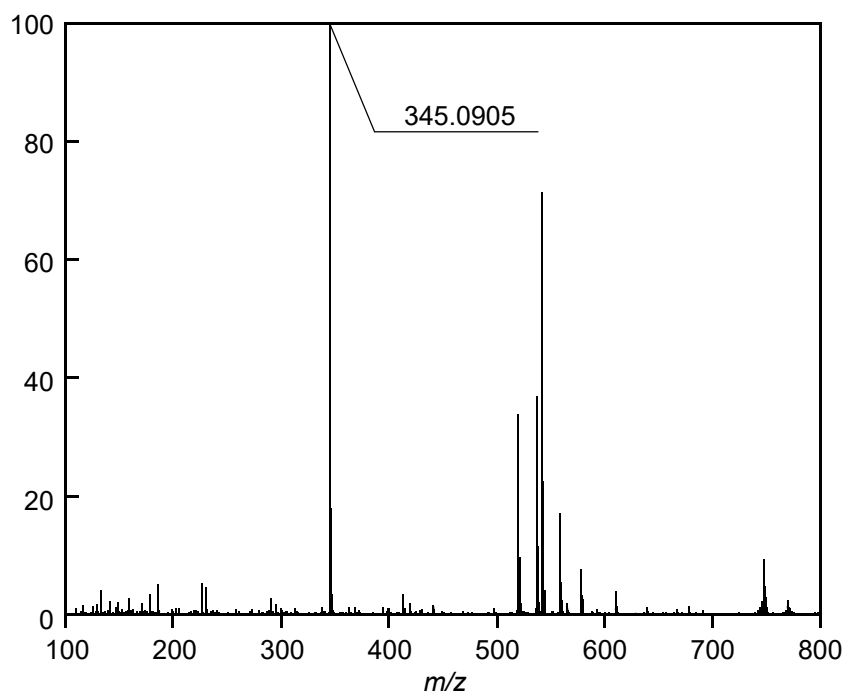

**Fig. S3** Positive ion ESI-MS/MS spectrum of protonated NNM-1 ( $m/z$  520) recorded with a 35% normalised collision energy.

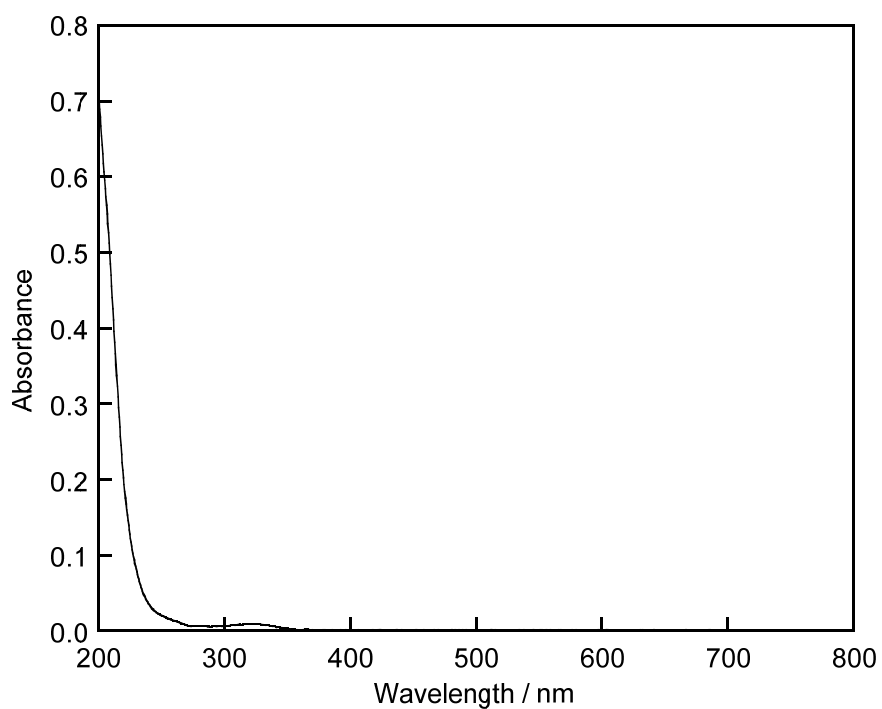

**Fig. S4** UV-vis spectrum of the sodium salt of **1** in  $H_2O$  ( $[1] = 0.40$  mM).

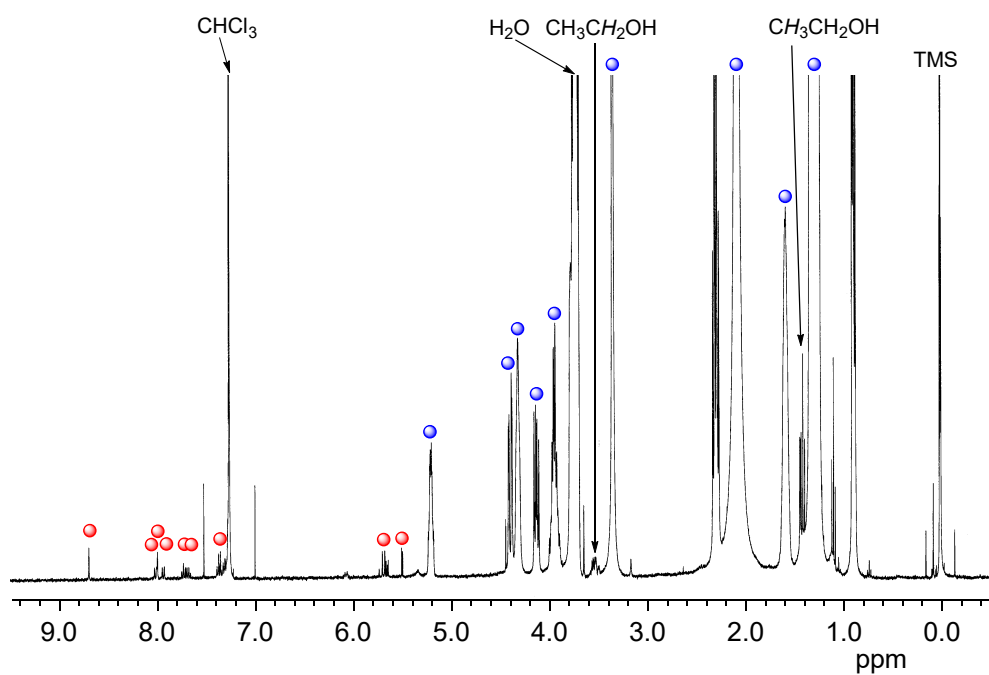

**Fig. S5** Complete  $^1\text{H}$  NMR spectrum of the residue of LMI-NNM-1 solution after photoirradiation at 365 nm for 12 h and lyophilisation ( $\text{CDCl}_3$ ,  $[\text{EtOH}] = 0.4$  mM, red circles: NNM-1, blue circles: DMPC).

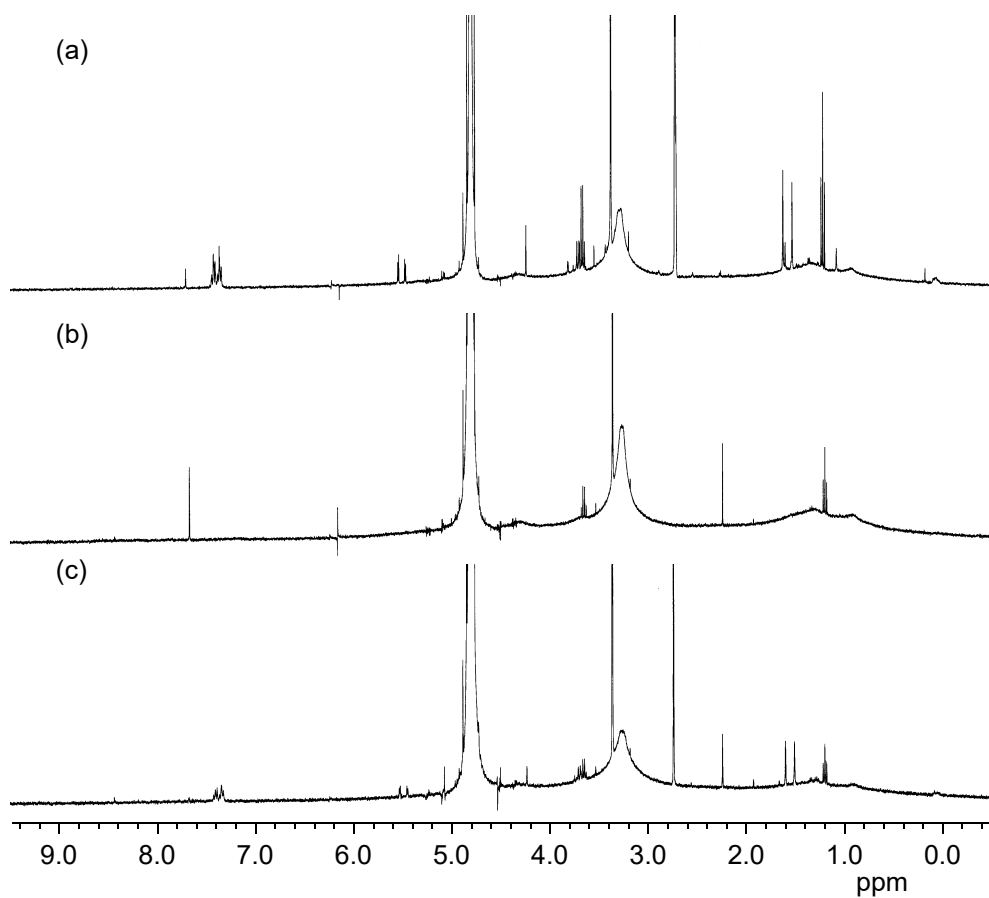

**Fig. S6** Complete  $^1\text{H}$  NMR spectra of (a) **1** and (b and c) NNM-1 (b) before and (c) after photoirradiation at 365 nm for 12 h in the presence of liposomes in  $\text{D}_2\text{O}$  ( $[\text{DMPC}] = 4.0$  mM and  $[\mathbf{1}] = [\text{NNM-1}] = 0.40$  mM).
